# Supplementary material for: Atomically resolved Au52Cu72(SR)55 nanoalloy reveals Marks decahedron truncation and Penrose tiling surface
Source: PubMed Central journal article supplement (PMC6981204; doi:10.1038/s41467-020-14400-2), 2020-01-24
Supplement: 41467_2020_14400_MOESM1_ESM.pdf [file 41467_2020_14400_MOESM1_ESM.pdf]

**Atomically resolved Au<sub>52</sub>Cu<sub>72</sub>(SR)<sub>55</sub> nanoalloy reveals Marks decahedron truncation and Penrose tiling surface**

Song *et al*

**Supplementary Table 1** Crystal data and structure refinement for  $[\text{Au}_{52}\text{Cu}_{72}(\text{p-MBT})_{55}]^+\text{Cl}^-$ .

|                                               |                                                                           |
|-----------------------------------------------|---------------------------------------------------------------------------|
| Identification code                           | $\text{Cu}_{72}\text{Au}_{52}$                                            |
| Empirical formula                             | $\text{C}_{385}\text{H}_{385}\text{Au}_{52}\text{ClCu}_{72}\text{S}_{55}$ |
| Formula weight                                | 21627.80                                                                  |
| Temperature/K                                 | 123                                                                       |
| Crystal system                                | triclinic                                                                 |
| Space group                                   | $\text{P}\bar{1}$                                                         |
| $a/\text{\AA}$                                | 25.8880(19)                                                               |
| $b/\text{\AA}$                                | 26.7997(18)                                                               |
| $c/\text{\AA}$                                | 45.013(3)                                                                 |
| $\alpha/^\circ$                               | 79.828(2)                                                                 |
| $\beta/^\circ$                                | 85.255(3)                                                                 |
| $\gamma/^\circ$                               | 69.166(2)                                                                 |
| Volume/ $\text{\AA}^3$                        | 28722(3)                                                                  |
| Z                                             | 2                                                                         |
| $\rho_{\text{calc}}/\text{cm}^3$              | 2.501                                                                     |
| $\mu/\text{mm}^{-1}$                          | 32.176                                                                    |
| F(000)                                        | 19576.0                                                                   |
| Crystal size/ $\text{mm}^3$                   | $0.42 \times 0.22 \times 0.20$                                            |
| Radiation                                     | $\text{GaK}_\alpha$ ( $\lambda = 1.34139$ )                               |
| $2\Theta$ range for data collection/ $^\circ$ | 1.736 to 110.384                                                          |
| Index ranges                                  | $-31 \leq h \leq 31, -32 \leq k \leq 32, -40 \leq l \leq 54$              |
| Reflections collected                         | 356930                                                                    |
| Independent reflections                       | 108535 [ $R_{\text{int}} = 0.0445, R_{\text{sigma}} = 0.0475$ ]           |
| Data/restraints/parameters                    | 108535/0/5042                                                             |
| Goodness-of-fit on $F^2$                      | 1.090                                                                     |
| Final R indexes [ $I \geq 2\sigma(I)$ ]       | $R_1 = 0.0388, wR_2 = 0.1090$                                             |
| Final R indexes [all data]                    | $R_1 = 0.0525, wR_2 = 0.1146$                                             |
| Largest diff. peak/hole / $e \text{\AA}^{-3}$ | 3.92/-2.15                                                                |

**Supplementary Table 2** The result of ICP-MS analysis on the  $[\text{Cu}_{72}\text{Au}_{52}(\text{p-MBT})_{55}]^+$  nanoalloy.

|                                | Cu (ppm) | Au (ppm) | Cu : Au (mol) |
|--------------------------------|----------|----------|---------------|
| $\text{Cu}_{72}\text{Au}_{52}$ | 91.38    | 204.34   | 72 : 51.89    |
|                                | 40.43    | 90.46    | 72 : 51.92    |
|                                | 105.69   | 237.21   | 72 : 52.08    |

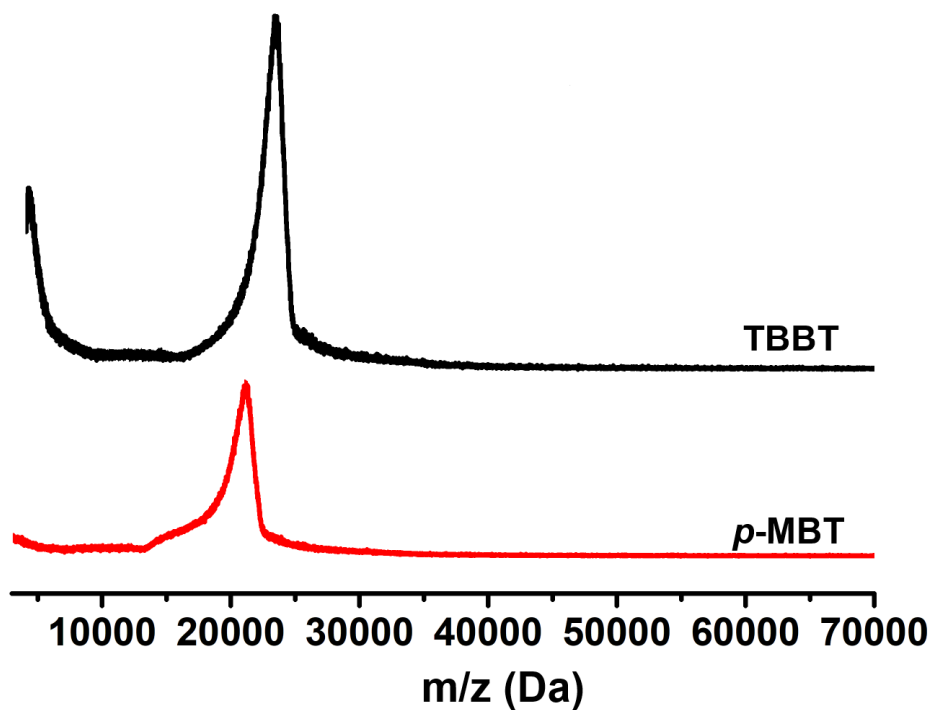

**Supplementary Fig 1** MALDI mass spectra of  $[\text{Au}_{52}\text{Cu}_{72}(\text{SR})_{55}]^+$  capped by *p*-MBT (red) or TBBT (black) in positive mode (TBBT = SPh-<sup>t</sup>Bu and *p*-MBT = SPh-*p*-CH<sub>3</sub>).

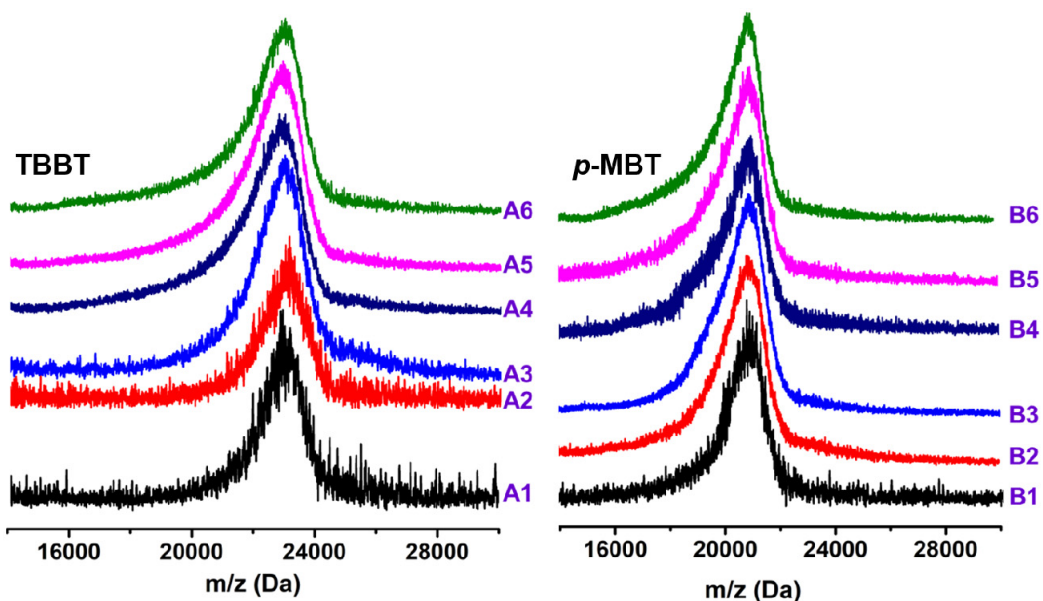

**Supplementary Fig 2** Intensity-dependent MALDI mass spectra of  $[\text{Au}_{52}\text{Cu}_{72}(\text{TBBT})_{55}]^+$  (left panel) and  $[\text{Au}_{52}\text{Cu}_{72}(\text{p-MBT})_{55}]^+$  (right panel) nanoalloys. The different parameters (A1/B1-A5/B5) in MALDI-MS are listed in Table S3.

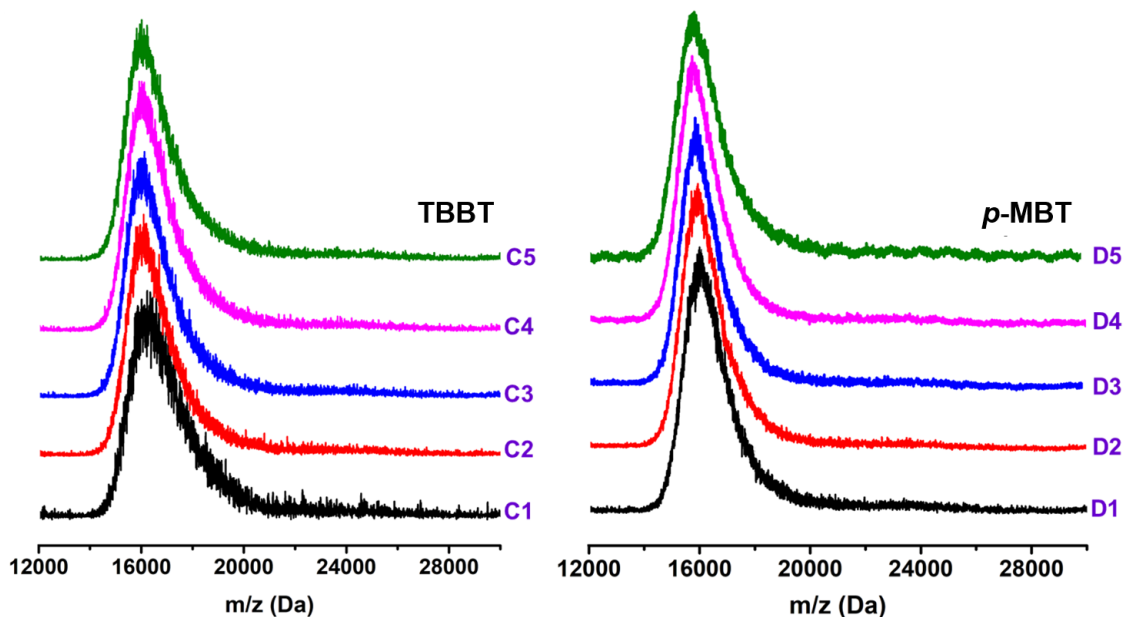

**Supplementary Fig 3** Intensity-dependent LDI mass spectra of  $[\text{Au}_{52}\text{Cu}_{72}(\text{TBBT})_{55}]^+$  (left) and  $[\text{Au}_{52}\text{Cu}_{72}(\text{p-MBT})_{55}]^+$  (right) nanoalloys. The different parameters (C1/D1-C5/D5) in LDI-MS are listed in Table S3.

Supplementary Table 3 Different parameters in MALDI/LDI-MS

|         | A1/B1 | A2/B2 | A3/B3 | A4/B4 | A5/B5 | A6/B6 | C1/D1 | C2/D2 | C3/D3 | C4/D4 | C5/D5 |
|---------|-------|-------|-------|-------|-------|-------|-------|-------|-------|-------|-------|
| Offset  | 55%   | 60%   | 70%   | 80%   | 90%   | 70%   | 60%   | 70%   | 80%   | 90%   | 70%   |
| Range   | 20%   | 20%   | 20%   | 20%   | 10%   | 30%   | 20%   | 20%   | 20%   | 10%   | 30%   |
| Linear  | 90X   | 90X   | 90X   | 90X   | 90X   | 90X   | 90X   | 90X   | 90X   | 90X   | 90X   |
| Percent | 100%  | 100%  | 100%  | 100%  | 100%  | 100%  | 100%  | 100%  | 100%  | 100%  | 100%  |

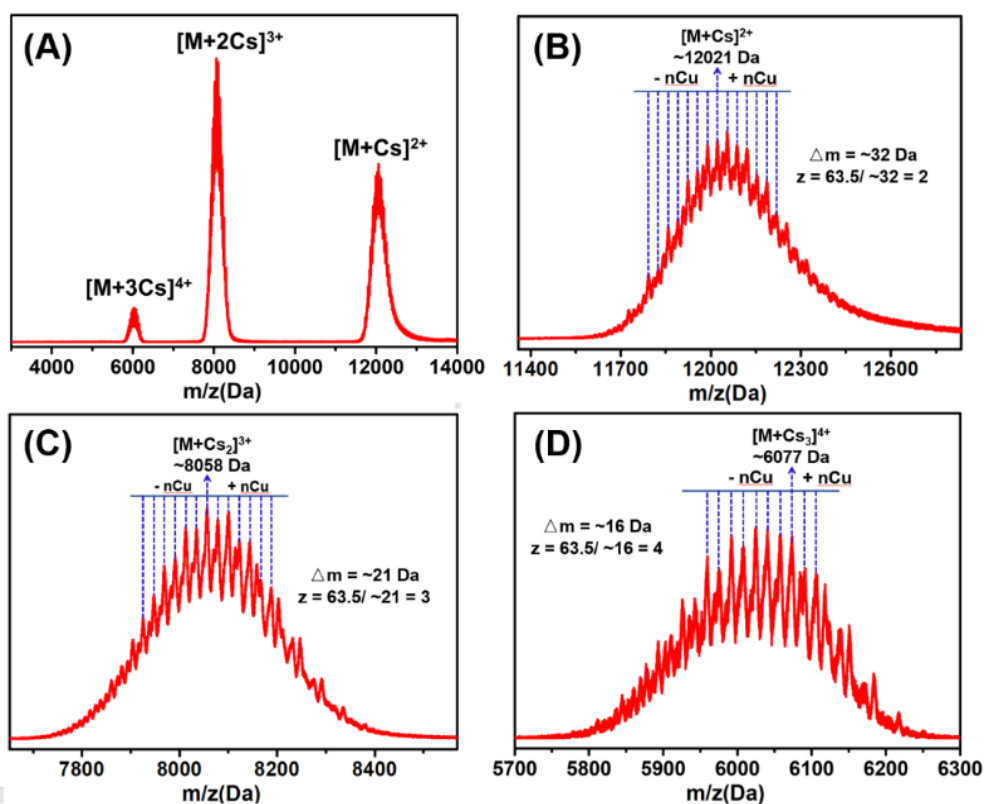

Supplementary Fig 4 The ESI mass spectrum of the  $[Au_{52}Cu_{72}(TBBT)_{55}]^+$  in positive mode by adding  $Cs^+$ . (A) Full spectrum, (B) Zoom-in of the 2+ ion set, (C) Zoom-in of the 3+ ion set, and (D) Zoom-in of the 4+ ion set.

**Supplementary Table 4** The assignments of the peaks in each set in the ESI mass spectrum.

| Peaks in set a |                                                                                  | Peaks in set b |                                                                                    | Peaks in set c |                                                                                    |
|----------------|----------------------------------------------------------------------------------|----------------|------------------------------------------------------------------------------------|----------------|------------------------------------------------------------------------------------|
| value          | Assigned formula                                                                 | value          | Assigned formula                                                                   | value          | Assigned formula                                                                   |
| 12178          | $[\text{Au}_{52}\text{Cu}_{77}(\text{SR})_{55}\text{Cs}]^{2+}$                   | 8163           | $[\text{Au}_{52}\text{Cu}_{77}(\text{SR})_{55}\text{Cs}_2]^{3+}$                   | 6156           | $[\text{Au}_{52}\text{Cu}_{77}(\text{SR})_{55}\text{Cs}_3]^{4+}$                   |
| 12147          | $[\text{Au}_{52}\text{Cu}_{76}(\text{SR})_{55}\text{Cs}]^{2+}$                   | 8142           | $[\text{Au}_{52}\text{Cu}_{76}(\text{SR})_{55}\text{Cs}_2]^{3+}$                   | 6140           | $[\text{Au}_{52}\text{Cu}_{76}(\text{SR})_{55}\text{Cs}_3]^{4+}$                   |
| 12115          | $[\text{Au}_{52}\text{Cu}_{75}(\text{SR})_{55}\text{Cs}]^{2+}$                   | 8121           | $[\text{Au}_{52}\text{Cu}_{75}(\text{SR})_{55}\text{Cs}_2]^{3+}$                   | 6124           | $[\text{Au}_{52}\text{Cu}_{75}(\text{SR})_{55}\text{Cs}_3]^{4+}$                   |
| 12083          | $[\text{Au}_{52}\text{Cu}_{74}(\text{SR})_{55}\text{Cs}]^{2+}$                   | 8099           | $[\text{Au}_{52}\text{Cu}_{74}(\text{SR})_{55}\text{Cs}_2]^{3+}$                   | 6108           | $[\text{Au}_{52}\text{Cu}_{74}(\text{SR})_{55}\text{Cs}_3]^{4+}$                   |
| 12052          | $[\text{Au}_{52}\text{Cu}_{73}(\text{SR})_{55}\text{Cs}]^{2+}$                   | 8078           | $[\text{Au}_{52}\text{Cu}_{73}(\text{SR})_{55}\text{Cs}_2]^{3+}$                   | 6092           | $[\text{Au}_{52}\text{Cu}_{73}(\text{SR})_{55}\text{Cs}_3]^{4+}$                   |
| <b>12021</b>   | <b><math>[\text{Au}_{52}\text{Cu}_{72}(\text{SR})_{55}\text{Cs}]^{2+}</math></b> | <b>8058</b>    | <b><math>[\text{Au}_{52}\text{Cu}_{72}(\text{SR})_{55}\text{Cs}_2]^{3+}</math></b> | <b>6077</b>    | <b><math>[\text{Au}_{52}\text{Cu}_{72}(\text{SR})_{55}\text{Cs}_3]^{4+}</math></b> |
| 11988          | $[\text{Au}_{52}\text{Cu}_{71}(\text{SR})_{55}\text{Cs}]^{2+}$                   | 8036           | $[\text{Au}_{52}\text{Cu}_{71}(\text{SR})_{55}\text{Cs}_2]^{3+}$                   | 6060           | $[\text{Au}_{52}\text{Cu}_{71}(\text{SR})_{55}\text{Cs}_3]^{4+}$                   |
| 11956          | $[\text{Au}_{52}\text{Cu}_{70}(\text{SR})_{55}\text{Cs}]^{2+}$                   | 8015           | $[\text{Au}_{52}\text{Cu}_{70}(\text{SR})_{55}\text{Cs}_2]^{3+}$                   | 6044           | $[\text{Au}_{52}\text{Cu}_{70}(\text{SR})_{55}\text{Cs}_3]^{4+}$                   |
| 11924          | $[\text{Au}_{52}\text{Cu}_{69}(\text{SR})_{55}\text{Cs}]^{2+}$                   | 7994           | $[\text{Au}_{52}\text{Cu}_{69}(\text{SR})_{55}\text{Cs}_2]^{3+}$                   | 6029           | $[\text{Au}_{52}\text{Cu}_{69}(\text{SR})_{55}\text{Cs}_3]^{4+}$                   |
| 11893          | $[\text{Au}_{52}\text{Cu}_{68}(\text{SR})_{55}\text{Cs}]^{2+}$                   | 7973           | $[\text{Au}_{52}\text{Cu}_{68}(\text{SR})_{55}\text{Cs}_2]^{3+}$                   | 6013           | $[\text{Au}_{52}\text{Cu}_{68}(\text{SR})_{55}\text{Cs}_3]^{4+}$                   |
| 11861          | $[\text{Au}_{52}\text{Cu}_{67}(\text{SR})_{55}\text{Cs}]^{2+}$                   | 7951           | $[\text{Au}_{52}\text{Cu}_{67}(\text{SR})_{55}\text{Cs}_2]^{3+}$                   | 5997           | $[\text{Au}_{52}\text{Cu}_{67}(\text{SR})_{55}\text{Cs}_3]^{4+}$                   |

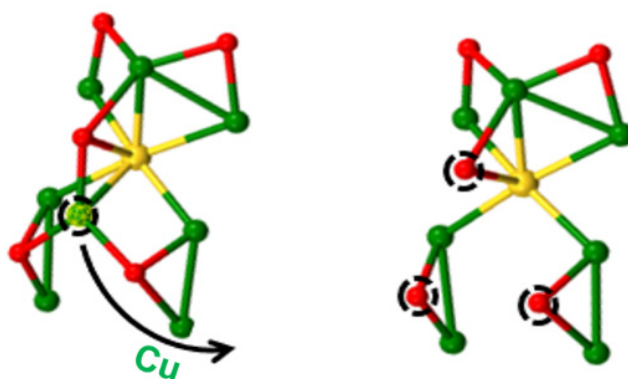

**Supplementary Fig 5** A possible pathway for losing surface Cu atoms under ESI-MS conditions (Cu: green, S: red).

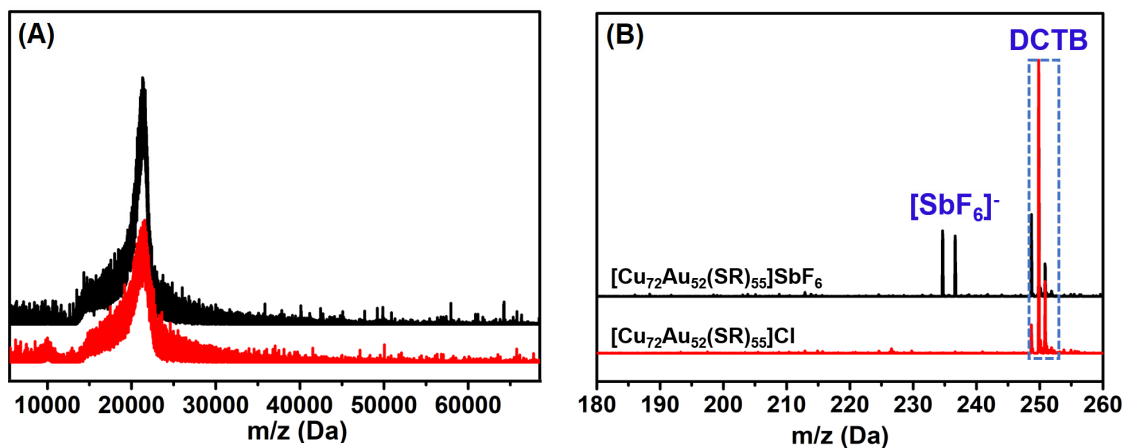

**Supplementary Fig 6** Experimental proof for the existence of  $\text{Cl}^-$  in the  $[\text{Cu}_{72}\text{Au}_{52}(\text{p-MBT})_{55}]\text{Cl}$  nanoalloys. (A) High-mass range spectra of  $[\text{Au}_{52}\text{Cu}_{72}(\text{p-MBT})_{55}]\text{Cl}$  (red spectrum) and  $[\text{Au}_{52}\text{Cu}_{72}(\text{p-MBT})_{55}]\text{SbF}_6$  (black); (B) low-mass range spectra, in which the peaks for  $[\text{SbF}_6]^-$  were found in addition to those from the matrix (i.e., DCTB (*trans*-2-[3-(4-*tert*-Butylphenyl)-2-methyl-2-propenylidene]malononitrile)).

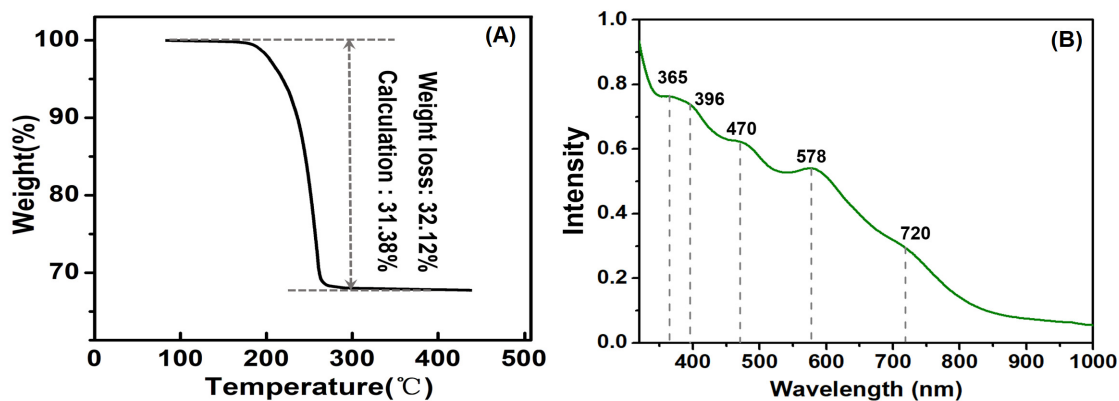

**Supplementary Fig 7** (A) The thermogravimetric analysis, and (B) The UV-vis absorption spectrum of  $[\text{Cu}_{72}\text{Au}_{52}(\text{p-MBT})_{55}]^+$  nanoalloys.

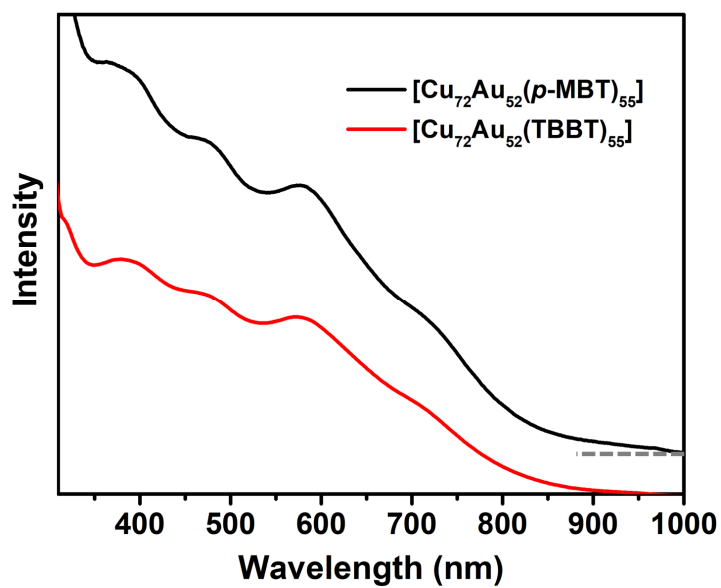

**Supplementary Fig 8** UV-vis absorption spectra of two  $[\text{Cu}_{72}\text{Au}_{52}(\text{SR})_{55}]^+$  nanoalloys protecting by different ligands.

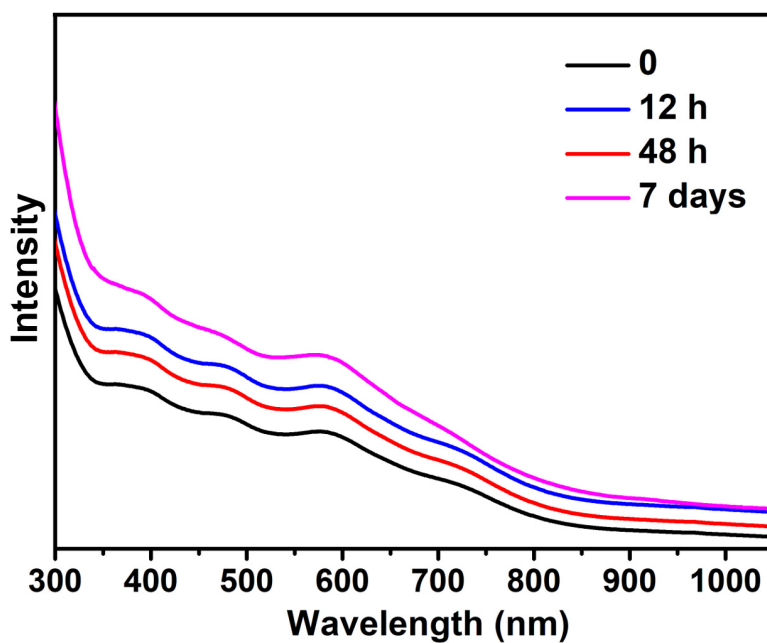

**Supplementary Fig 9** Time-dependent UV-vis absorption spectra of  $[\text{Cu}_{72}\text{Au}_{52}(\text{SR})_{55}]^+$  nanoalloys in  $\text{CH}_2\text{Cl}_2$  in the air atmosphere (room temperature).



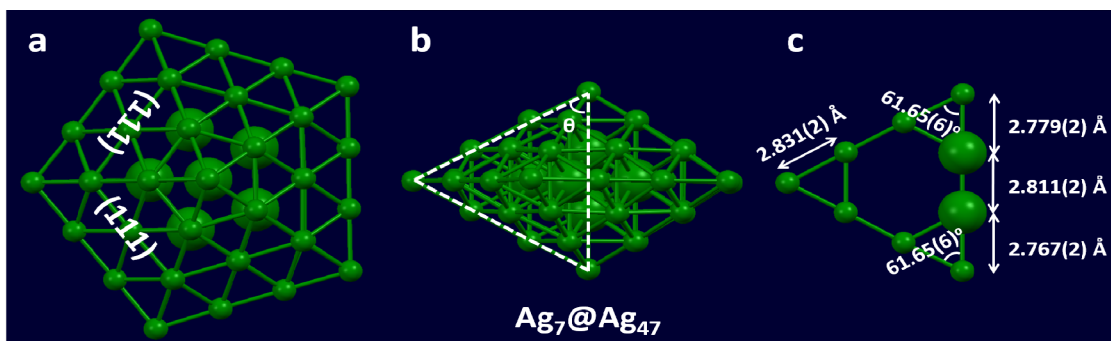

**Supplementary Fig 10** (a) top view and (b) side view of the  $\text{Ag}_7@Ag_{47}$  shells in  $\text{Ag}_{136}$  (ref. 30) and (c) the triangle formed by twinning edges and apex in the  $\text{Ag}_{47}$  shell.

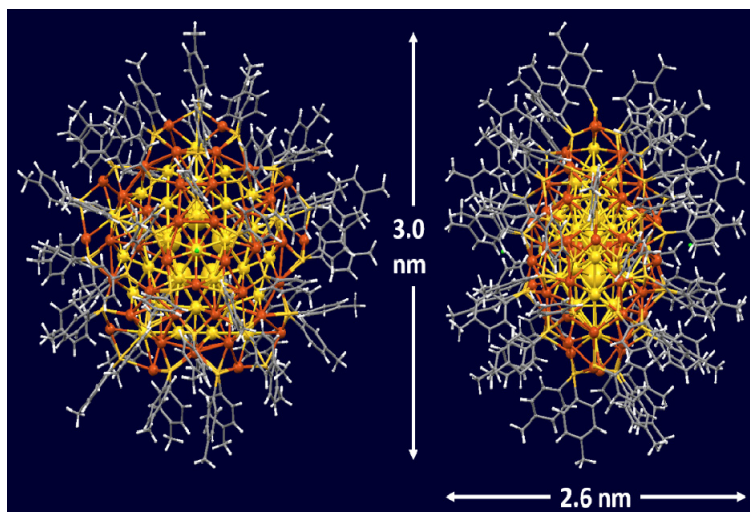

**Supplementary Fig 11** The overall size of  $[\text{Cu}_{72}\text{Au}_{52}(\text{SR})_{55}]^+$ .

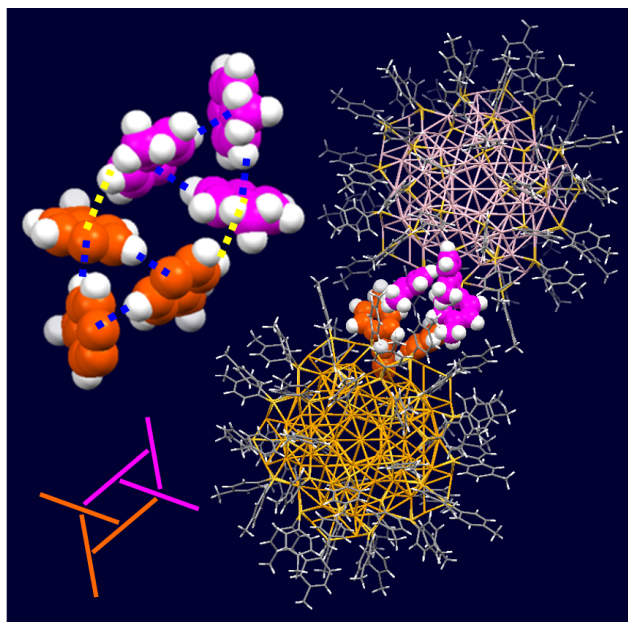

**Supplementary Fig 12** Intra- and inter-cluster interactions between two  $[\text{Cu}_{72}\text{Au}_{52}(\text{SR})_{55}]^+$  nanoalloy in an edge-to-edge approach, showing six interacting *p*-MBT ligands in a triangular mosaic pattern. Color labels: pink, light orange = Au/Cu, yellow = S, grey, magenta, orange = C, and white = H.

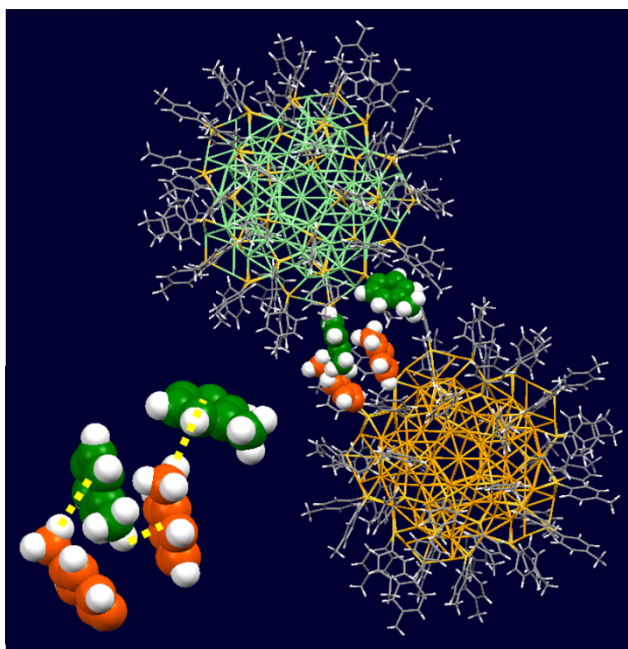

**Supplementary Fig 13** Inter-cluster interactions between two  $[\text{Cu}_{72}\text{Au}_{52}(\text{SR})_{55}]^+$  nanoalloys in a tip-to-tip approach. Color labels: light green, light orange = Au/Cu, yellow = S, grey, green, orange = C, and white = H.

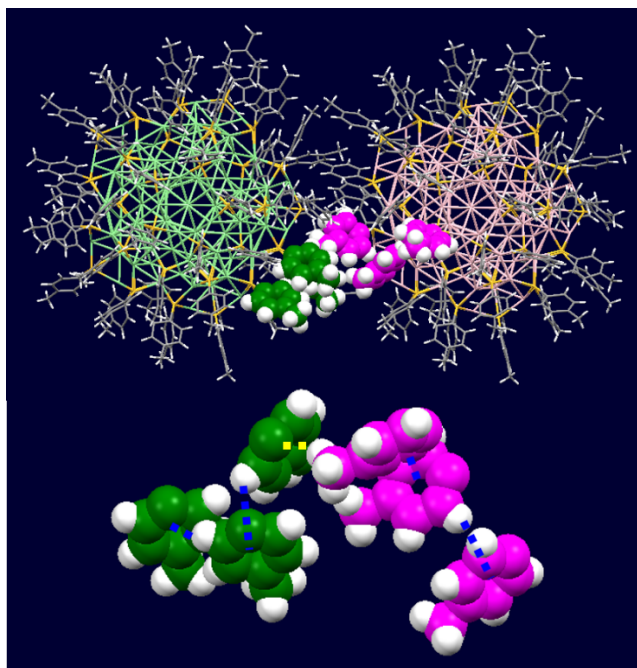

**Supplementary Fig 14** Intra- and inter-cluster interactions between two  $[\text{Cu}_{72}\text{Au}_{52}(\text{SR})_{55}]^+$  nanoalloy in a tip-to-edge approach. Color labels: light green, pink = Au/Cu, yellow = S, grey, green, magenta = C, and white = H.

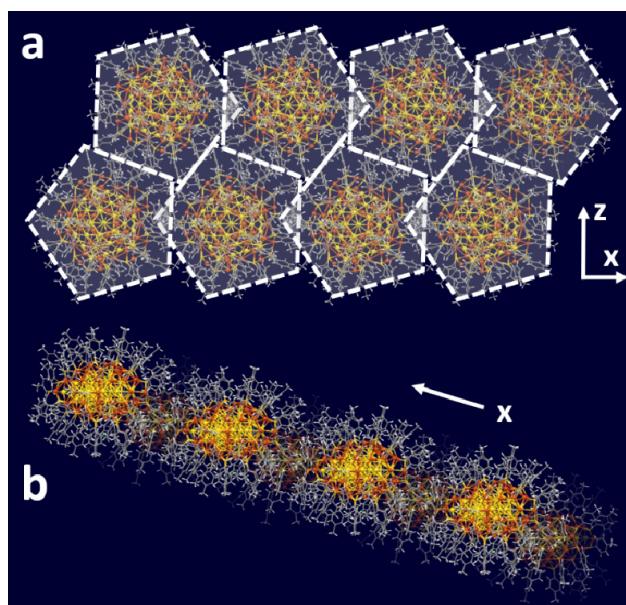

**Supplementary Fig 15** (a) front and (b) top view of the twin nanowire formed by interlocked  $[\text{Cu}_{72}\text{Au}_{52}(\text{SR})_{55}]^+$  nanoalloys along x axis.

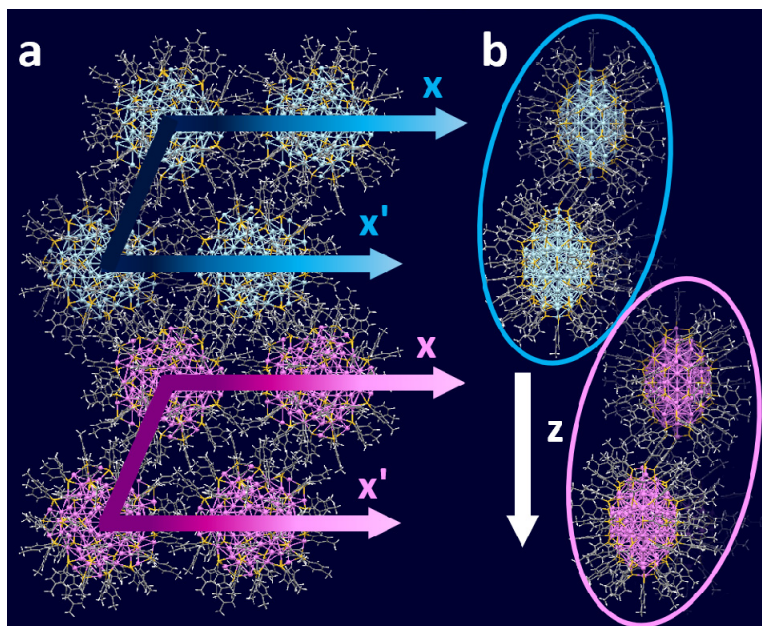

**Supplementary Fig 16** (a) front and (b) side view of the two sets of nanowires which are not interact along z axis. Each nanowire is composed of two lines (x and x') of interlocked  $[\text{Cu}_{72}\text{Au}_{52}(\text{SR})_{55}]^+$  nanoalloys.

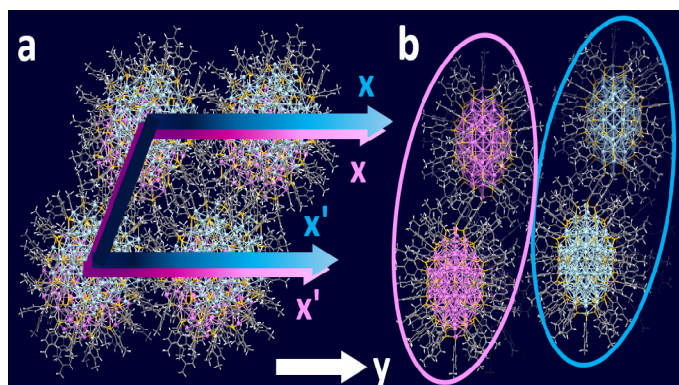

**Supplementary Fig 17** (a) front and (b) top view of the two sets of nanowires which are not interact along y axis. Each nanowire is composed of two lines (x and x') of interlocked  $[\text{Cu}_{72}\text{Au}_{52}(\text{SR})_{55}]^+$  nanoalloys.
